# Supplementary material for: Sustainable route to methyl-9-hydroxononanoate (polymer precursor) by oxidative cleavage of fatty acid methyl ester from rapeseed oil
Source: Royal Society of Chemistry journal article supplement (doi:10.1039/c3gc41491d), 2013-10-04
Supplement: c3gc41491d.pdf [file c3gc41491d.pdf]

## Supporting information

# Sustainable route to methyl-9-hydroxononanoate (polymer precursor) by oxidative cleavage of fatty acid methyl ester from rapeseed oil

Kévin Louis,<sup>a</sup> Laurence Vivier,<sup>a</sup> Jean-Marc Clacens,<sup>a</sup> Markus Brandhorst,<sup>b</sup> Jean-Luc Dubois,<sup>c</sup> Karine De Oliveira Vigier\*<sup>a</sup> and Y. Pouilloux\*<sup>a</sup>

<sup>a</sup> Université de Poitiers - IC2MP- UMR CNRS 72854, rue Michel Brunet, 86022 Poitiers Cedex, France ; <sup>b</sup> ARKEMA FRANCE, Rue Henri Moissan, 69493 Pierre-Bénite, France ; <sup>c</sup> ARKEMA FRANCE, 420 Rue d'Estienne d'Orves, 92705 Colombes, France

The <sup>1</sup>H NMR spectra was recorded on a Bruker Avance III Ultrashield+ 400 MHz spectrometer with CDCl<sub>3</sub> as solvent, and chemical shifts were given in ppm downfield from trimethylsilane (TMS).

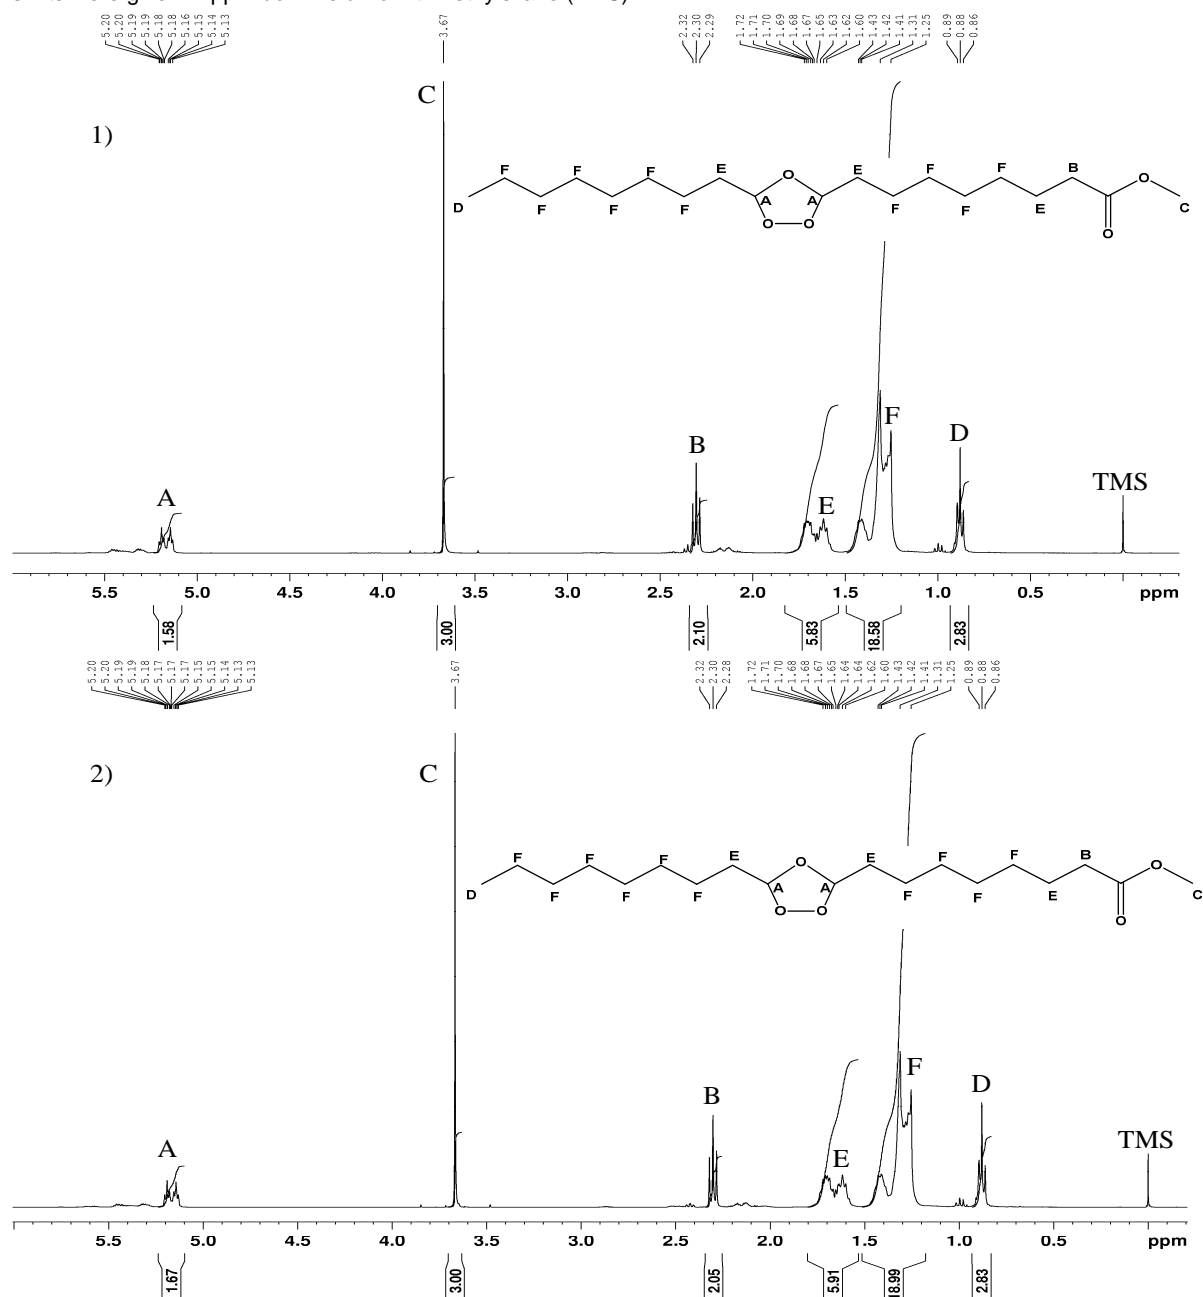

Figure S1. Stability of ozonides at room temperature. 1) Fresh ozonides mixture. 2) Ozonides mixture after 12 weeks store at room temperature.

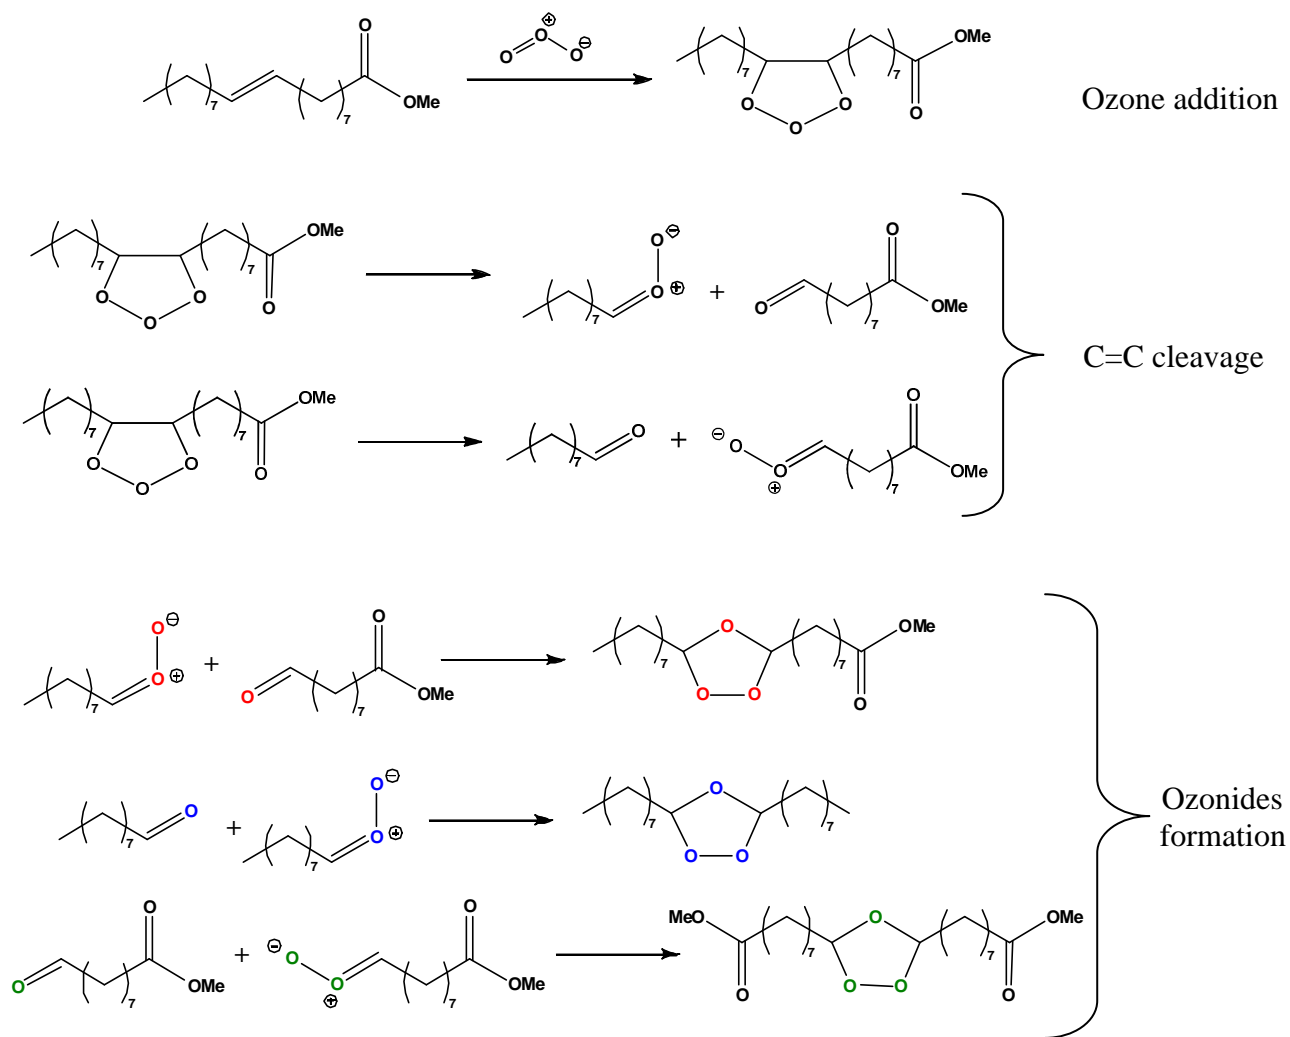

Figure S2 : Mechanism of the ozonides formation.

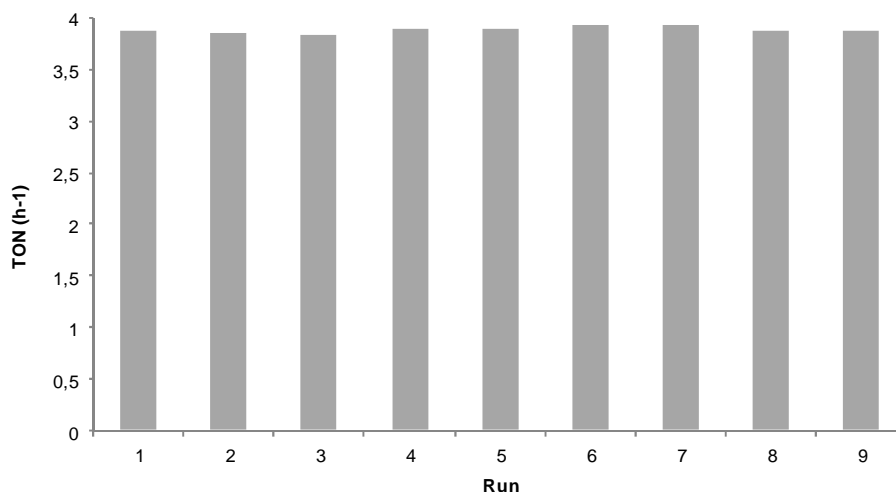

Figure S3 : Study of recyclability of Pd(5)/C catalyst during catalytic reduction of ozonides of FAME from rapeseed oil. Conditions: Ozonides (20 mmol), Pd(5)/C (10 wt%),  $H_2$  ( $200 mL \cdot min^{-1}$ ), 9.5 h, room temperature.

Table S1 : Ozonolysis of methyl oleate in non-polar solvents

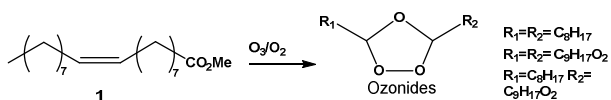

| Entry          | Solvent         | Conversion of <b>1</b> (%) | Selectivity (%) |
|----------------|-----------------|----------------------------|-----------------|
| 1 <sup>a</sup> | Dichloromethane | >99                        | >99             |
| 2 <sup>b</sup> | Dichloromethane | >99                        | >99             |
| 3 <sup>c</sup> | Dichloromethane | >99                        | >99             |
| 4 <sup>c</sup> | n-Pentane       | >99                        | >99             |
| 5 <sup>c</sup> | n-Hexane        | >99                        | >99             |
| 6 <sup>c</sup> | n-Heptane       | >99                        | >99             |
| 7 <sup>d</sup> | -               | >99                        | >99             |
| 8 <sup>d</sup> | -               | >99                        | >99             |

Conditions:  $\text{O}_3/\text{O}_2$  (1.6 mol %), 200 mL.min<sup>-1</sup>, 1-2 min. a T=-78°C, b T=0°C, c T=25°C, d from FAME issued from rapeseed oil.
